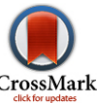

## Correction

# Correction: The Duration of Uncertain Times: Audiovisual Information about Intervals Is Integrated in a Statistically Optimal Fashion

The *PLOS ONE* Staff

### Notice of Republication

This article was republished April 3, 2014, to correct numerous spacing errors throughout the text that were introduced during the typesetting process. Please download this article again to view the correct version. The originally published, uncorrected article and the republished, corrected article are provided here for reference. The publisher apologizes for this error.

### Supporting Information

**File S1.** Originally published, uncorrected article.

**File S2.** Republished, corrected article.

### Reference

1. Hartcher-O'Brien J, Di Luca M, Ernst MO (2014) The Duration of Uncertain Times: Audiovisual Information about Intervals Is Integrated in a Statistically Optimal Fashion. *PLoS ONE* 9(3): e89339. doi:10.1371/journal.pone.0089339

**Citation:** The *PLOS ONE* Staff (2014) Correction: The Duration of Uncertain Times: Audiovisual Information about Intervals Is Integrated in a Statistically Optimal Fashion. *PLoS ONE* 9(4): e96134. doi:10.1371/journal.pone.0096134

**Published:** April 18, 2014

**Copyright:** © 2014 The *PLOS ONE* Staff. This is an open-access article distributed under the terms of the Creative Commons Attribution License, which permits unrestricted use, distribution, and reproduction in any medium, provided the original author and source are credited.
